# Supplementary material
Source: PubMed Central journal article supplement (PMC6439672)
Supplement: jama-321-969-s001.pdf [file jama-321-969-s001.pdf]

## Supplementary Online Content

Zeng C, Dubreuil M, Larochelle M. Association of tramadol with all-cause mortality among patients with osteoarthritis. *JAMA*. doi:10.1001/jama.2019.1347

**eTable 1.** Baseline characteristics of unmatched and propensity-score matched osteoarthritis patients ( $\geq 50$  years) initiating tramadol prescription or naproxen prescription.

**eTable 2.** Baseline characteristics of unmatched and propensity-score matched osteoarthritis patients ( $\geq 50$  years) initiating tramadol prescription or diclofenac prescription.

**eTable 3.** Baseline characteristics of unmatched and propensity-score matched osteoarthritis patients ( $\geq 50$  years) initiating tramadol prescription or celecoxib prescription.

**eTable 4.** Baseline characteristics of unmatched and propensity-score matched osteoarthritis patients ( $\geq 50$  years) initiating tramadol prescription or etoricoxib prescription.

**eTable 5.** Baseline characteristics of unmatched and propensity-score matched osteoarthritis patients ( $\geq 50$  years) initiating tramadol prescription or codeine prescription.

This supplementary material has been provided by the authors to give readers additional information about their work.

**eTable 1. Baseline characteristics of unmatched and propensity-score matched osteoarthritis patients (≥ 50 years) initiating tramadol prescription or naproxen prescription**

| Variable list                                                 | Unmatched           |                     | Standardized difference | Propensity-score matched |                     | Standardized difference |
|---------------------------------------------------------------|---------------------|---------------------|-------------------------|--------------------------|---------------------|-------------------------|
|                                                               | Tramadol (n=31,087) | Naproxen (n=26,731) |                         | Tramadol (n=12,397)      | Naproxen (n=12,397) |                         |
| <b>Demographics</b>                                           |                     |                     |                         |                          |                     |                         |
| Age, mean (SD), y                                             | 71.0 (9.7)          | 67.6 (9.4)          | 0.362                   | 69.4 (9.6)               | 69.4 (9.5)          | 0.002                   |
| Socioeconomic deprivation index score, mean (SD) <sup>a</sup> | 2.6 (1.4)           | 2.4 (1.3)           | 0.170                   | 2.5 (1.4)                | 2.5 (1.4)           | 0.010                   |
| Female (%)                                                    | 63.1                | 55.5                | 0.154                   | 59.2                     | 59.6                | 0.009                   |
| <b>Time block</b>                                             |                     |                     |                         |                          |                     |                         |
| 01/01/2000-12/31/2000                                         | 2.1                 | 1.8                 | 0.019                   | 1.8                      | 1.8                 | 0.000                   |
| 01/01/2001-12/31/2001                                         | 3.2                 | 1.8                 | 0.090                   | 2.0                      | 2.0                 | 0.000                   |
| 01/01/2002-12/31/2002                                         | 4.3                 | 1.7                 | 0.151                   | 2.1                      | 2.1                 | 0.000                   |
| 01/01/2003-12/31/2003                                         | 5.2                 | 1.7                 | 0.191                   | 2.3                      | 2.3                 | 0.000                   |
| 01/01/2004-12/31/2004                                         | 6.0                 | 2.0                 | 0.207                   | 3.1                      | 3.1                 | 0.000                   |
| 01/01/2005-12/31/2005                                         | 8.5                 | 3.0                 | 0.235                   | 4.7                      | 4.7                 | 0.000                   |
| 01/01/2006-12/31/2006                                         | 8.7                 | 3.0                 | 0.244                   | 4.8                      | 4.8                 | 0.000                   |
| 01/01/2007-12/31/2007                                         | 9.0                 | 3.6                 | 0.221                   | 5.8                      | 5.8                 | 0.000                   |
| 01/01/2008-12/31/2008                                         | 9.3                 | 6.8                 | 0.093                   | 9.9                      | 9.9                 | 0.000                   |
| 01/01/2009-12/31/2009                                         | 9.1                 | 8.0                 | 0.042                   | 11.0                     | 11.0                | 0.000                   |
| 01/01/2010-12/31/2010                                         | 8.5                 | 8.6                 | 0.002                   | 10.7                     | 10.7                | 0.000                   |
| 01/01/2011-12/31/2011                                         | 7.7                 | 13.1                | 0.179                   | 12.0                     | 12.0                | 0.000                   |

| 01/01/2012-12/31/2012                   | 6.7                 | 12.7                | 0.203                   |  | 10.6                     | 10.6                | 0.000                   |
|-----------------------------------------|---------------------|---------------------|-------------------------|--|--------------------------|---------------------|-------------------------|
| 01/01/2013-12/31/2013                   | 5.5                 | 12.5                | 0.249                   |  | 8.7                      | 8.7                 | 0.000                   |
| Variable list                           | Unmatched           |                     | Standardized difference |  | Propensity-score matched |                     | Standardized difference |
|                                         | Tramadol (n=31,087) | Naproxen (n=26,731) |                         |  | Tramadol (n=12,397)      | Naproxen (n=12,397) |                         |
| 01/01/2014-12/31/2014                   | 3.8                 | 11.0                | 0.276                   |  | 6.5                      | 6.5                 | 0.000                   |
| 01/01/2015-12/31/2015                   | 2.5                 | 8.7                 | 0.273                   |  | 4.0                      | 4.0                 | 0.000                   |
| <b>BMI, mean (SD), kg/m<sup>2</sup></b> | 29.3 (5.9)          | 28.9 (5.5)          | 0.061                   |  | 29.1 (5.7)               | 29.2 (5.6)          | 0.012                   |
| <b>OA duration, mean (SD), y</b>        | 6.8 (6.9)           | 6.6 (6.5)           | 0.034                   |  | 6.8 (6.8)                | 6.8 (6.6)           | 0.002                   |
| <b>Site of OA</b>                       |                     |                     |                         |  |                          |                     |                         |
| Knee OA only                            | 53.2                | 56.2                | 0.062                   |  | 56.3                     | 56.4                | 0.002                   |
| Hip OA only                             | 30.5                | 24.1                | 0.145                   |  | 25.8                     | 26.2                | 0.009                   |
| Hand OA only                            | 7.7                 | 13.3                | 0.185                   |  | 10.1                     | 9.7                 | 0.016                   |
| Knee and hip OA                         | 5.5                 | 3.5                 | 0.096                   |  | 4.6                      | 4.6                 | 0.002                   |
| Knee and hand OA                        | 1.9                 | 1.9                 | 0.003                   |  | 2.1                      | 2.0                 | 0.002                   |
| Hip and hand OA                         | 0.9                 | 0.7                 | 0.024                   |  | 0.9                      | 0.9                 | 0.000                   |
| Knee, hip, and hand OA                  | 0.3                 | 0.2                 | 0.027                   |  | 0.3                      | 0.2                 | 0.002                   |
| <b>Lifestyle factors</b>                |                     |                     |                         |  |                          |                     |                         |
| Drinking (%)                            |                     |                     |                         |  |                          |                     |                         |
| None                                    | 22.8                | 17.0                | 0.128                   |  | 19.1                     | 19.2                | 0.003                   |
| Past                                    | 3.2                 | 2.3                 | 0.050                   |  | 2.8                      | 2.8                 | 0.001                   |
| Current                                 | 74.0                | 80.7                | 0.164                   |  | 78.1                     | 78.0                | 0.003                   |
| Smoking (%)                             |                     |                     |                         |  |                          |                     |                         |
| None                                    | 53.5                | 56.8                | 0.081                   |  | 53.5                     | 53.7                | 0.003                   |
| Past                                    | 32.9                | 31.2                | 0.025                   |  | 33.9                     | 33.7                | 0.003                   |

|                             |                                |                                |                                |  |                                 |                                |                                |
|-----------------------------|--------------------------------|--------------------------------|--------------------------------|--|---------------------------------|--------------------------------|--------------------------------|
| Current                     | 13.6                           | 12.0                           | 0.041                          |  | 12.6                            | 12.6                           | 0.001                          |
| <b>Comorbidity (%)</b>      |                                |                                |                                |  |                                 |                                |                                |
| Peptic ulcer                | 9.8                            | 4.5                            | 0.206                          |  | 6.5                             | 6.1                            | 0.014                          |
| <b>Variable list</b>        | <b>Unmatched</b>               |                                | <b>Standardized difference</b> |  | <b>Propensity-score matched</b> |                                | <b>Standardized difference</b> |
|                             | <b>Tramadol<br/>(n=31,087)</b> | <b>Naproxen<br/>(n=26,731)</b> |                                |  | <b>Tramadol<br/>(n=12,397)</b>  | <b>Naproxen<br/>(n=12,397)</b> |                                |
| Gastrointestinal bleeding   | 3.3                            | 1.4                            | 0.125                          |  | 2.1                             | 2.0                            | 0.006                          |
| <b>CKD</b>                  |                                |                                |                                |  |                                 |                                |                                |
| Non-CKD                     | 86.7                           | 90.0                           | 0.100                          |  | 87.1                            | 87.1                           | 0.000                          |
| CKD stage 1                 | 0.1                            | 0.1                            | 0.007                          |  | 0.1                             | 0.1                            | 0.005                          |
| CKD stage 2                 | 1.1                            | 1.4                            | 0.024                          |  | 1.5                             | 1.6                            | 0.005                          |
| CKD stage 3                 | 9.7                            | 7.8                            | 0.069                          |  | 10.1                            | 10.1                           | 0.001                          |
| CKD stage 4                 | 0.8                            | 0.2                            | 0.082                          |  | 0.4                             | 0.4                            | 0.000                          |
| CKD stage 5                 | 0.5                            | 0.1                            | 0.065                          |  | 0.3                             | 0.2                            | 0.011                          |
| CKD stage unknown           | 1.0                            | 0.4                            | 0.072                          |  | 0.6                             | 0.5                            | 0.001                          |
| Diabetes                    | 15.4                           | 12.1                           | 0.096                          |  | 14.6                            | 14.5                           | 0.002                          |
| Hypertension                | 54.3                           | 44.6                           | 0.196                          |  | 52.1                            | 52.4                           | 0.005                          |
| Liver disease               | 2.8                            | 2.2                            | 0.033                          |  | 2.5                             | 2.5                            | 0.001                          |
| Transient ischaemic attack  | 4.6                            | 2.4                            | 0.120                          |  | 3.2                             | 3.3                            | 0.007                          |
| Ischaemic heart disease     | 19.5                           | 10.0                           | 0.271                          |  | 14.2                            | 14.6                           | 0.010                          |
| Congestive heart failure    | 5.4                            | 1.7                            | 0.199                          |  | 2.8                             | 2.6                            | 0.017                          |
| Myocardial infarction       | 6.9                            | 3.5                            | 0.157                          |  | 4.9                             | 5.0                            | 0.005                          |
| Stroke                      | 4.5                            | 2.3                            | 0.122                          |  | 3.3                             | 3.2                            | 0.002                          |
| Angina                      | 13.2                           | 6.5                            | 0.227                          |  | 9.4                             | 9.7                            | 0.010                          |
| Peripheral vascular disease | 2.6                            | 1.1                            | 0.113                          |  | 1.7                             | 1.7                            | 0.003                          |

| Pneumonia or infection                | 8.2                 | 6.6                 | 0.060                   |  | 7.3                      | 7.2                 | 0.002                   |
|---------------------------------------|---------------------|---------------------|-------------------------|--|--------------------------|---------------------|-------------------------|
| Hyperlipidaemia                       | 17.9                | 16.3                | 0.043                   |  | 18.4                     | 18.2                | 0.004                   |
| Dementia                              | 1.2                 | 1.0                 | 0.019                   |  | 1.0                      | 1.1                 | 0.007                   |
| Varicose veins                        | 14.1                | 12.6                | 0.045                   |  | 14.0                     | 14.1                | 0.002                   |
| Variable list                         | Unmatched           |                     | Standardized difference |  | Propensity-score matched |                     | Standardized difference |
|                                       | Tramadol (n=31,087) | Naproxen (n=26,731) |                         |  | Tramadol (n=12,397)      | Naproxen (n=12,397) |                         |
| Other circulatory disease             | 34.5                | 29.2                | 0.113                   |  | 32.7                     | 32.4                | 0.008                   |
| Depression                            | 15.3                | 12.7                | 0.073                   |  | 14.4                     | 14.5                | 0.002                   |
| Venous thromboembolism                | 5.5                 | 2.9                 | 0.128                   |  | 4.0                      | 3.9                 | 0.007                   |
| Chronic obstructive pulmonary disease | 7.2                 | 3.6                 | 0.163                   |  | 5.0                      | 4.8                 | 0.006                   |
| Atrial fibrillation                   | 8.2                 | 2.9                 | 0.232                   |  | 4.8                      | 4.5                 | 0.016                   |
| Anxiety                               | 16.1                | 13.7                | 0.232                   |  | 15.8                     | 15.6                | 0.016                   |
| Seizure                               | 0.5                 | 0.5                 | 0.006                   |  | 0.5                      | 0.5                 | 0.000                   |
| Sleep disorder or sleep apnea         | 2.1                 | 1.9                 | 0.016                   |  | 2.0                      | 2.1                 | 0.003                   |
| <b>Medication (%)</b>                 |                     |                     |                         |  |                          |                     |                         |
| Other NSAIDs                          | 85.4                | 84.7                | 0.021                   |  | 85.7                     | 86.2                | 0.015                   |
| Other opioids                         | 40.7                | 27.4                | 0.283                   |  | 35.4                     | 35.9                | 0.011                   |
| Aspirin                               | 42.0                | 28.6                | 0.284                   |  | 36.1                     | 36.7                | 0.011                   |
| Statin                                | 48.1                | 41.5                | 0.133                   |  | 47.6                     | 47.9                | 0.005                   |
| Glucocorticoids                       | 25.5                | 18.6                | 0.166                   |  | 22.7                     | 22.9                | 0.004                   |
| Nitrates                              | 18.2                | 9.9                 | 0.239                   |  | 13.5                     | 13.7                | 0.008                   |
| Antihypertensive medicine             | 72.2                | 57.8                | 0.307                   |  | 67.0                     | 67.6                | 0.013                   |
| Antidiabetic medicine                 | 11.1                | 8.4                 | 0.090                   |  | 10.2                     | 10.2                | 0.000                   |
| ACE inhibitors                        | 39.3                | 30.4                | 0.188                   |  | 36.7                     | 36.9                | 0.005                   |

| Angiotensin receptor blocker         | 15.0                   | 11.6                   | 0.100                   |  | 14.2                     | 14.3                   | 0.001                   |
|--------------------------------------|------------------------|------------------------|-------------------------|--|--------------------------|------------------------|-------------------------|
| Beta receptor inhibitor              | 38.0                   | 29.8                   | 0.175                   |  | 35.8                     | 36.0                   | 0.004                   |
| Calcium channel blockers             | 38.2                   | 28.3                   | 0.211                   |  | 34.9                     | 35.0                   | 0.001                   |
| Loop diuretics                       | 26.7                   | 12.8                   | 0.355                   |  | 17.9                     | 18.0                   | 0.003                   |
| Thiazide-like diuretics              | 6.3                    | 4.6                    | 0.073                   |  | 5.5                      | 5.5                    | 0.000                   |
| Variable list                        | Unmatched              |                        | Standardized difference |  | Propensity-score matched |                        | Standardized difference |
|                                      | Tramadol<br>(n=31,087) | Naproxen<br>(n=26,731) |                         |  | Tramadol<br>(n=12,397)   | Naproxen<br>(n=12,397) |                         |
| Potassium-sparing diuretics          | 12.4                   | 5.3                    | 0.251                   |  | 7.6                      | 7.6                    | 0.000                   |
| Insulin                              | 3.0                    | 1.8                    | 0.079                   |  | 2.2                      | 2.2                    | 0.004                   |
| Anticoagulants                       | 10.9                   | 4.0                    | 0.268                   |  | 6.4                      | 6.1                    | 0.014                   |
| Benzodiazepines                      | 39.2                   | 31.4                   | 0.164                   |  | 35.7                     | 35.8                   | 0.003                   |
| SSRI                                 | 23.3                   | 20.4                   | 0.070                   |  | 22.1                     | 22.5                   | 0.011                   |
| SNRI                                 | 6.3                    | 5.2                    | 0.048                   |  | 5.8                      | 6.0                    | 0.006                   |
| Healthcare utilization, mean (SD)    |                        |                        |                         |  |                          |                        |                         |
| Hospitalizations <sup>b</sup>        | 0.8 (1.6)              | 0.5 (1.1)              | 0.210                   |  | 0.7 (1.3)                | 0.7 (1.4)              | 0.015                   |
| General practice visits <sup>b</sup> | 14.2 (12.3)            | 10.7 (9.0)             | 0.324                   |  | 12.8 (10.0)              | 12.7 (10.3)            | 0.008                   |
| Specialist referrals <sup>b</sup>    | 1.3 (1.7)              | 1.1 (1.5)              | 0.107                   |  | 1.3 (1.6)                | 1.3 (1.7)              | 0.008                   |

Abbreviations: BMI, body mass index; n, number; CKD, chronic kidney disease; NSAID, non-steroidal anti-inflammatory drug; ACE, angiotensin converting enzyme; SSRI, Selective serotonin reuptake inhibitor; SNRI, Serotonin–norepinephrine reuptake inhibitor; OA, osteoarthritis; y, years; SD, standard deviation.

<sup>a</sup> The Socioeconomic deprivation index score (i.e., Townsend Deprivation Index) ranged from 1 (least deprived) to 5 (most deprived).

<sup>b</sup> Frequency during the past two years.

**eTable 2. Baseline characteristics of unmatched and propensity-score matched osteoarthritis patients (≥ 50 years) initiating tramadol prescription or diclofenac prescription**

| Variable list                                                 | Unmatched           |                       | Standardized difference | Propensity-score matched |                      | Standardized difference |
|---------------------------------------------------------------|---------------------|-----------------------|-------------------------|--------------------------|----------------------|-------------------------|
|                                                               | Tramadol (n=16,372) | Diclofenac (n=21,675) |                         | Tramadol (n=6,512)       | Diclofenac (n=6,512) |                         |
| <b>Demographics</b>                                           |                     |                       |                         |                          |                      |                         |
| Age, mean (SD), y                                             | 72.1 (9.7)          | 67.5 (9.7)            | 0.479                   | 70.3 (9.6)               | 70.3 (9.5)           | 0.001                   |
| Socioeconomic deprivation index score, mean (SD) <sup>a</sup> | 2.6 (1.4)           | 2.4 (1.3)             | 0.137                   | 2.5 (1.4)                | 2.5 (1.4)            | 0.012                   |
| Female (%)                                                    | 63.7                | 55.4                  | 0.169                   | 61.5                     | 62.5                 | 0.021                   |
| <b>Time block</b>                                             |                     |                       |                         |                          |                      |                         |
| 01/01/2000-12/31/2000                                         | 2.1                 | 7.4                   | 0.253                   | 2.8                      | 2.8                  | 0.000                   |
| 01/01/2001-12/31/2001                                         | 2.9                 | 8.4                   | 0.239                   | 4.0                      | 4.0                  | 0.000                   |
| 01/01/2002-12/31/2002                                         | 4.0                 | 8.1                   | 0.174                   | 5.3                      | 5.3                  | 0.000                   |
| 01/01/2003-12/31/2003                                         | 4.8                 | 8.7                   | 0.157                   | 6.1                      | 6.1                  | 0.000                   |
| 01/01/2004-12/31/2004                                         | 5.5                 | 9.4                   | 0.148                   | 7.7                      | 7.7                  | 0.000                   |
| 01/01/2005-12/31/2005                                         | 7.8                 | 12.5                  | 0.157                   | 11.1                     | 11.1                 | 0.000                   |
| 01/01/2006-12/31/2006                                         | 7.3                 | 9.6                   | 0.083                   | 10.6                     | 10.6                 | 0.000                   |
| 01/01/2007-12/31/2007                                         | 7.3                 | 9.3                   | 0.074                   | 10.4                     | 10.4                 | 0.000                   |
| 01/01/2008-12/31/2008                                         | 8.0                 | 7.4                   | 0.021                   | 10.1                     | 10.1                 | 0.000                   |
| 01/01/2009-12/31/2009                                         | 8.2                 | 6.3                   | 0.073                   | 9.5                      | 9.5                  | 0.000                   |
| 01/01/2010-12/31/2010                                         | 7.9                 | 5.0                   | 0.119                   | 7.4                      | 7.4                  | 0.000                   |
| 01/01/2011-12/31/2011                                         | 8.3                 | 3.3                   | 0.218                   | 6.1                      | 6.1                  | 0.000                   |
| 01/01/2012-12/31/2012                                         | 7.7                 | 2.3                   | 0.250                   | 4.5                      | 4.5                  | 0.000                   |

| 01/01/2013-12/31/2013                   | 7.6                 | 1.0                   | 0.327                   |  | 2.1                      | 2.1                  | 0.000                   |
|-----------------------------------------|---------------------|-----------------------|-------------------------|--|--------------------------|----------------------|-------------------------|
| Variable list                           | Unmatched           |                       | Standardized difference |  | Propensity-score matched |                      | Standardized difference |
|                                         | Tramadol (n=16,372) | Diclofenac (n=21,675) |                         |  | Tramadol (n=6,512)       | Diclofenac (n=6,512) |                         |
| 01/01/2014-12/31/2014                   | 6.2                 | 0.7                   | 0.304                   |  | 1.5                      | 1.5                  | 0.000                   |
| 01/01/2015-12/31/2015                   | 4.4                 | 0.5                   | 0.257                   |  | 0.8                      | 0.8                  | 0.000                   |
| <b>BMI, mean (SD), kg/m<sup>2</sup></b> | 29.2 (5.9)          | 28.3 (5.2)            | 0.168                   |  | 28.7 (5.6)               | 28.8 (5.6)           | 0.009                   |
| <b>OA duration, mean (SD), y</b>        | 6.8 (7.1)           | 5.8 (6.5)             | 0.138                   |  | 6.4 (6.8)                | 6.4 (6.8)            | 0.003                   |
| <b>Site of OA</b>                       |                     |                       |                         |  |                          |                      |                         |
| Knee OA only                            | 52.9                | 56.4                  | 0.071                   |  | 55.9                     | 55.9                 | 0.002                   |
| Hip OA only                             | 31.3                | 26.4                  | 0.109                   |  | 28.9                     | 28.7                 | 0.005                   |
| Hand OA only                            | 7.3                 | 12.1                  | 0.162                   |  | 8.7                      | 8.3                  | 0.014                   |
| Knee and hip OA                         | 5.3                 | 2.9                   | 0.120                   |  | 3.9                      | 4.2                  | 0.019                   |
| Knee and hand OA                        | 1.8                 | 1.3                   | 0.041                   |  | 1.6                      | 1.8                  | 0.009                   |
| Hip and hand OA                         | 1.0                 | 0.6                   | 0.037                   |  | 0.8                      | 0.8                  | 0.003                   |
| Knee, hip, and hand OA                  | 0.3                 | 0.2                   | 0.035                   |  | 0.2                      | 0.3                  | 0.006                   |
| <b>Lifestyle factors</b>                |                     |                       |                         |  |                          |                      |                         |
| Drinking (%)                            |                     |                       |                         |  |                          |                      |                         |
| None                                    | 23.8                | 17.4                  | 0.166                   |  | 20.9                     | 21.9                 | 0.023                   |
| Past                                    | 3.4                 | 1.6                   | 0.115                   |  | 2.4                      | 2.5                  | 0.003                   |
| Current                                 | 72.8                | 81.0                  | 0.095                   |  | 76.7                     | 75.7                 | 0.023                   |
| Smoking (%)                             |                     |                       |                         |  |                          |                      |                         |
| None                                    | 53.6                | 56.7                  | 0.026                   |  | 54.8                     | 54.1                 | 0.012                   |
| Past                                    | 33.6                | 28.7                  | 0.123                   |  | 32.4                     | 32.9                 | 0.011                   |
| Current                                 | 12.7                | 14.6                  | 0.042                   |  | 12.8                     | 12.9                 | 0.002                   |



| <b>Comorbidity (%)</b>      |                                |                                  |                                |                                 |                                 |                                |       |
|-----------------------------|--------------------------------|----------------------------------|--------------------------------|---------------------------------|---------------------------------|--------------------------------|-------|
| Peptic ulcer                | 11.1                           | 5.3                              | 0.213                          |                                 | 8.9                             | 8.6                            | 0.011 |
| <b>Variable list</b>        | <b>Unmatched</b>               |                                  | <b>Standardized difference</b> | <b>Propensity-score matched</b> |                                 | <b>Standardized difference</b> |       |
|                             | <b>Tramadol<br/>(n=16,372)</b> | <b>Diclofenac<br/>(n=21,675)</b> |                                | <b>Tramadol<br/>(n=6,512)</b>   | <b>Diclofenac<br/>(n=6,512)</b> |                                |       |
| Gastrointestinal bleeding   | 3.8                            | 1.3                              | 0.157                          |                                 | 2.7                             | 2.5                            | 0.017 |
| CKD                         |                                |                                  |                                |                                 |                                 |                                |       |
| Non-CKD                     | 85.4                           | 95.6                             | 0.355                          |                                 | 91.2                            | 91.3                           | 0.005 |
| CKD stage 1                 | 0.1                            | 0.1                              | 0.009                          |                                 | 0.0                             | 0.1                            | 0.012 |
| CKD stage 2                 | 1.2                            | 0.5                              | 0.075                          |                                 | 0.9                             | 1.0                            | 0.014 |
| CKD stage 3                 | 10.6                           | 3.0                              | 0.302                          |                                 | 6.4                             | 6.2                            | 0.01  |
| CKD stage 4                 | 1.0                            | 0.1                              | 0.116                          |                                 | 0.3                             | 0.3                            | 0.003 |
| CKD stage 5                 | 0.6                            | 0.2                              | 0.071                          |                                 | 0.3                             | 0.3                            | 0.000 |
| CKD stage unknown           | 1.1                            | 0.4                              | 0.079                          |                                 | 0.8                             | 0.8                            | 0.005 |
| Diabetes                    | 16.6                           | 9.2                              | 0.221                          |                                 | 13.2                            | 13.8                           | 0.018 |
| Hypertension                | 56.7                           | 39.8                             | 0.343                          |                                 | 52.5                            | 52.9                           | 0.009 |
| Liver disease               | 2.9                            | 1.6                              | 0.085                          |                                 | 2.3                             | 2.2                            | 0.008 |
| Transient ischaemic attack  | 5.1                            | 2.6                              | 0.133                          |                                 | 4.2                             | 4.1                            | 0.006 |
| Ischaemic heart disease     | 21.0                           | 11.8                             | 0.252                          |                                 | 18.0                            | 18.0                           | 0.002 |
| Congestive heart failure    | 6.3                            | 2.4                              | 0.191                          |                                 | 4.5                             | 4.3                            | 0.009 |
| Myocardial infarction       | 7.5                            | 4.1                              | 0.146                          |                                 | 6.2                             | 6.2                            | 0.001 |
| Stroke                      | 5.2                            | 2.5                              | 0.145                          |                                 | 3.7                             | 3.9                            | 0.011 |
| Angina                      | 13.9                           | 8.3                              | 0.181                          |                                 | 12.6                            | 12.7                           | 0.005 |
| Peripheral vascular disease | 2.7                            | 1.2                              | 0.112                          |                                 | 2.0                             | 2.0                            | 0.001 |
| Pneumonia or infection      | 8.1                            | 6.5                              | 0.061                          |                                 | 7.6                             | 7.6                            | 0.000 |

| Hyperlipidaemia                       | 18.1                | 12.1                  | 0.170                   |  | 17.2                     | 17.2                 | 0.000                   |
|---------------------------------------|---------------------|-----------------------|-------------------------|--|--------------------------|----------------------|-------------------------|
| Dementia                              | 1.5                 | 0.7                   | 0.080                   |  | 0.9                      | 0.8                  | 0.007                   |
| Varicose veins                        | 13.1                | 12.2                  | 0.028                   |  | 12.9                     | 13.1                 | 0.006                   |
| Variable list                         | Unmatched           |                       | Standardized difference |  | Propensity-score matched |                      | Standardized difference |
|                                       | Tramadol (n=16,372) | Diclofenac (n=21,675) |                         |  | Tramadol (n=6,512)       | Diclofenac (n=6,512) |                         |
| Other circulatory disease             | 34.9                | 24.5                  | 0.228                   |  | 32.3                     | 32.5                 | 0.004                   |
| Depression                            | 14.9                | 10.3                  | 0.140                   |  | 13.7                     | 13.9                 | 0.008                   |
| Venous thromboembolism                | 5.8                 | 2.9                   | 0.145                   |  | 4.8                      | 4.5                  | 0.015                   |
| Chronic obstructive pulmonary disease | 8.3                 | 3.1                   | 0.225                   |  | 6.0                      | 5.5                  | 0.024                   |
| Atrial fibrillation                   | 9.8                 | 2.8                   | 0.292                   |  | 5.6                      | 5.3                  | 0.014                   |
| Anxiety                               | 15.8                | 11.8                  | 0.292                   |  | 15.2                     | 14.6                 | 0.014                   |
| Seizure                               | 0.5                 | 0.4                   | 0.023                   |  | 0.5                      | 0.4                  | 0.002                   |
| Sleep disorder or sleep apnea         | 1.9                 | 1.1                   | 0.062                   |  | 1.7                      | 1.8                  | 0.002                   |
| <b>Medication (%)</b>                 |                     |                       |                         |  |                          |                      |                         |
| Other NSAIDs                          | 72.0                | 67.6                  | 0.096                   |  | 73.2                     | 74.1                 | 0.021                   |
| Other opioids                         | 38.7                | 19.1                  | 0.443                   |  | 32.0                     | 32.9                 | 0.019                   |
| Aspirin                               | 42.0                | 26.2                  | 0.337                   |  | 37.3                     | 37.4                 | 0.003                   |
| Statin                                | 49.2                | 28.3                  | 0.438                   |  | 42.4                     | 42.6                 | 0.005                   |
| Glucocorticoids                       | 26.2                | 13.2                  | 0.331                   |  | 21.3                     | 21.0                 | 0.007                   |
| Nitrates                              | 18.9                | 9.8                   | 0.262                   |  | 15.5                     | 15.7                 | 0.006                   |
| Antihypertensive medicine             | 73.6                | 52.1                  | 0.456                   |  | 67.6                     | 68.5                 | 0.020                   |
| Antidiabetic medicine                 | 11.9                | 6.7                   | 0.181                   |  | 9.6                      | 10.0                 | 0.014                   |
| ACE inhibitors                        | 41.4                | 22.9                  | 0.403                   |  | 34.4                     | 35.3                 | 0.017                   |
| Angiotensin receptor blocker          | 15.9                | 7.2                   | 0.276                   |  | 12.7                     | 12.6                 | 0.003                   |

| Beta receptor inhibitor                  | 37.5                | 26.7                  | 0.231                   |  | 34.5                     | 35.3                 | 0.016                   |
|------------------------------------------|---------------------|-----------------------|-------------------------|--|--------------------------|----------------------|-------------------------|
| Calcium channel blockers                 | 40.4                | 22.8                  | 0.385                   |  | 34.5                     | 35.1                 | 0.013                   |
| Loop diuretics                           | 28.1                | 13.0                  | 0.381                   |  | 21.6                     | 21.3                 | 0.007                   |
| Thiazide-like diuretics                  | 6.9                 | 4.0                   | 0.131                   |  | 5.9                      | 5.9                  | 0.001                   |
| Variable list                            | Unmatched           |                       | Standardized difference |  | Propensity-score matched |                      | Standardized difference |
|                                          | Tramadol (n=16,372) | Diclofenac (n=21,675) |                         |  | Tramadol (n=6,512)       | Diclofenac (n=6,512) |                         |
| Potassium-sparing diuretics              | 12.7                | 7.0                   | 0.194                   |  | 10.5                     | 10.5                 | 0.000                   |
| Insulin                                  | 3.1                 | 1.4                   | 0.115                   |  | 2.1                      | 2.2                  | 0.007                   |
| Anticoagulants                           | 12.4                | 3.3                   | 0.342                   |  | 7.6                      | 6.9                  | 0.028                   |
| Benzodiazepines                          | 36.6                | 24.0                  | 0.278                   |  | 33.1                     | 33.4                 | 0.006                   |
| SSRI                                     | 21.6                | 13.7                  | 0.207                   |  | 18.7                     | 19.0                 | 0.009                   |
| SNRI                                     | 6.1                 | 3.1                   | 0.143                   |  | 4.3                      | 4.6                  | 0.010                   |
| <b>Healthcare utilization, mean (SD)</b> |                     |                       |                         |  |                          |                      |                         |
| Hospitalizations <sup>b</sup>            | 0.9 (1.7)           | 0.3 (0.9)             | 0.424                   |  | 0.6 (1.1)                | 0.6 (1.3)            | 0.012                   |
| General practice visits <sup>b</sup>     | 14.3 (12.8)         | 9.7 (8.7)             | 0.425                   |  | 12.8 (9.7)               | 12.9 (10.4)          | 0.008                   |
| Specialist referrals <sup>b</sup>        | 1.3 (1.8)           | 0.7 (1.1)             | 0.439                   |  | 1.0 (1.4)                | 1.0 (1.4)            | 0.009                   |

Abbreviations: BMI, body mass index; n, number; CKD, chronic kidney disease; NSAID, non-steroidal anti-inflammatory drug; ACE, angiotensin converting enzyme; SSRI, Selective serotonin reuptake inhibitor; SNRI, Serotonin–norepinephrine reuptake inhibitor; OA, osteoarthritis; y, years; SD, standard deviation.

<sup>a</sup> The Socioeconomic deprivation index score (i.e., Townsend Deprivation Index) ranged from 1 (least deprived) to 5 (most deprived).

<sup>b</sup> Frequency during the past two years.

**eTable 3. Baseline characteristics of unmatched and propensity-score matched osteoarthritis patients (≥ 50 years) initiating tramadol prescription or celecoxib prescription**

| Variable list                                                 | Unmatched           |                      | Standardized difference | Propensity-score matched |                     | Standardized difference |
|---------------------------------------------------------------|---------------------|----------------------|-------------------------|--------------------------|---------------------|-------------------------|
|                                                               | Tramadol (n=39,075) | Celecoxib (n=11,625) |                         | Tramadol (n=5,674)       | Celecoxib (n=5,674) |                         |
| <b>Demographics</b>                                           |                     |                      |                         |                          |                     |                         |
| Age, mean (SD), y                                             | 70.2 (9.7)          | 70.8 (9.6)           | 0.069                   | 69.9 (9.5)               | 69.8 (9.5)          | 0.008                   |
| Socioeconomic deprivation index score, mean (SD) <sup>a</sup> | 2.6 (1.4)           | 2.5 (1.3)            | 0.074                   | 2.6 (1.4)                | 2.6 (1.4)           | 0.006                   |
| Female (%)                                                    | 61.0                | 66.9                 | 0.121                   | 65.5                     | 65.2                | 0.006                   |
| <b>Time block</b>                                             |                     |                      |                         |                          |                     |                         |
| 01/01/2000-12/31/2000                                         | 2.4                 | 2.3                  | 0.009                   | 3.1                      | 3.1                 | 0.000                   |
| 01/01/2001-12/31/2001                                         | 3.4                 | 12.3                 | 0.337                   | 12.8                     | 12.8                | 0.000                   |
| 01/01/2002-12/31/2002                                         | 4.0                 | 19.4                 | 0.494                   | 16.7                     | 16.7                | 0.000                   |
| 01/01/2003-12/31/2003                                         | 4.4                 | 21.7                 | 0.532                   | 18.4                     | 18.4                | 0.000                   |
| 01/01/2004-12/31/2004                                         | 4.9                 | 27.5                 | 0.645                   | 21.9                     | 21.9                | 0.000                   |
| 01/01/2005-12/31/2005                                         | 6.7                 | 1.8                  | 0.245                   | 2.9                      | 2.9                 | 0.000                   |
| 01/01/2006-12/31/2006                                         | 7.3                 | 2.1                  | 0.252                   | 3.5                      | 3.5                 | 0.000                   |
| 01/01/2007-12/31/2007                                         | 7.8                 | 2.3                  | 0.255                   | 3.8                      | 3.8                 | 0.000                   |
| 01/01/2008-12/31/2008                                         | 8.2                 | 2.1                  | 0.281                   | 3.3                      | 3.3                 | 0.000                   |
| 01/01/2009-12/31/2009                                         | 8.6                 | 2.2                  | 0.288                   | 3.4                      | 3.4                 | 0.000                   |
| 01/01/2010-12/31/2010                                         | 8.6                 | 1.8                  | 0.308                   | 2.8                      | 2.8                 | 0.000                   |
| 01/01/2011-12/31/2011                                         | 8.4                 | 1.2                  | 0.340                   | 2.1                      | 2.1                 | 0.000                   |
| 01/01/2012-12/31/2012                                         | 8.1                 | 1.2                  | 0.334                   | 1.9                      | 1.9                 | 0.000                   |

| 01/01/2013-12/31/2013                   | 7.3                    | 0.7                     | 0.340                   |  | 1.0                      | 1.0                    | 0.000                   |
|-----------------------------------------|------------------------|-------------------------|-------------------------|--|--------------------------|------------------------|-------------------------|
| Variable list                           | Unmatched              |                         | Standardized difference |  | Propensity-score matched |                        | Standardized difference |
|                                         | Tramadol<br>(n=39,075) | Celecoxib<br>(n=11,625) |                         |  | Tramadol<br>(n=5,674)    | Celecoxib<br>(n=5,674) |                         |
| 01/01/2014-12/31/2014                   | 5.7                    | 0.7                     | 0.283                   |  | 1.2                      | 1.2                    | 0.000                   |
| 01/01/2015-12/31/2015                   | 4.1                    | 0.8                     | 0.220                   |  | 1.2                      | 1.2                    | 0.000                   |
| <b>BMI, mean (SD), kg/m<sup>2</sup></b> | 29.5 (5.9)             | 28.2 (5.1)              | 0.229                   |  | 28.6 (5.5)               | 28.6 (5.3)             | 0.001                   |
| <b>OA duration, mean (SD), y</b>        | 6.9 (6.9)              | 6.4 (6.5)               | 0.084                   |  | 6.6 (6.4)                | 6.6 (6.6)              | 0.002                   |
| <b>Site of OA</b>                       |                        |                         |                         |  |                          |                        |                         |
| Knee OA only                            | 54.1                   | 54.3                    | 0.005                   |  | 54.0                     | 53.9                   | 0.001                   |
| Hip OA only                             | 29.2                   | 26.1                    | 0.069                   |  | 27.9                     | 27.5                   | 0.008                   |
| Hand OA only                            | 7.9                    | 11.0                    | 0.106                   |  | 8.9                      | 9.2                    | 0.009                   |
| Knee and hip OA                         | 5.6                    | 4.8                     | 0.034                   |  | 5.9                      | 5.9                    | 0.001                   |
| Knee and hand OA                        | 2.0                    | 2.4                     | 0.026                   |  | 2.2                      | 2.2                    | 0.001                   |
| Hip and hand OA                         | 0.9                    | 1.1                     | 0.018                   |  | 0.8                      | 0.9                    | 0.013                   |
| Knee, hip, and hand OA                  | 0.4                    | 0.3                     | 0.009                   |  | 0.3                      | 0.3                    | 0.003                   |
| <b>Lifestyle factors</b>                |                        |                         |                         |  |                          |                        |                         |
| Drinking (%)                            |                        |                         |                         |  |                          |                        |                         |
| None                                    | 21.4                   | 21.3                    | 0.028                   |  | 21.6                     | 21.5                   | 0.003                   |
| Past                                    | 3.1                    | 2.0                     | 0.077                   |  | 2.6                      | 2.4                    | 0.016                   |
| Current                                 | 75.4                   | 76.7                    | 0.048                   |  | 75.7                     | 76.1                   | 0.009                   |
| Smoking (%)                             |                        |                         |                         |  |                          |                        |                         |
| None                                    | 52.8                   | 59.5                    | 0.079                   |  | 56.2                     | 55.7                   | 0.010                   |
| Past                                    | 33.2                   | 27.1                    | 0.159                   |  | 29.6                     | 30.0                   | 0.009                   |
| Current                                 | 13.9                   | 13.4                    | 0.033                   |  | 14.2                     | 14.3                   | 0.002                   |

| <b>Comorbidity (%)</b>      |                                |                                 |                                |  |                                 |                                |                                |
|-----------------------------|--------------------------------|---------------------------------|--------------------------------|--|---------------------------------|--------------------------------|--------------------------------|
| Peptic ulcer                | 8.9                            | 7.6                             | 0.046                          |  | 8.9                             | 8.8                            | 0.002                          |
| <b>Variable list</b>        | <b>Unmatched</b>               |                                 | <b>Standardized difference</b> |  | <b>Propensity-score matched</b> |                                | <b>Standardized difference</b> |
|                             | <b>Tramadol<br/>(n=39,075)</b> | <b>Celecoxib<br/>(n=11,625)</b> |                                |  | <b>Tramadol<br/>(n=5,674)</b>   | <b>Celecoxib<br/>(n=5,674)</b> |                                |
| Gastrointestinal bleeding   | 3.1                            | 2.2                             | 0.061                          |  | 2.9                             | 2.7                            | 0.012                          |
| CKD                         |                                |                                 |                                |  |                                 |                                |                                |
| Non-CKD                     | 86.9                           | 97.5                            | 0.400                          |  | 96.5                            | 96.3                           | 0.008                          |
| CKD stage 1                 | 0.1                            | 0.1                             | 0.015                          |  | 0.1                             | 0.0                            | 0.015                          |
| CKD stage 2                 | 1.2                            | 0.2                             | 0.115                          |  | 0.5                             | 0.4                            | 0.011                          |
| CKD stage 3                 | 9.7                            | 1.3                             | 0.376                          |  | 1.8                             | 2.0                            | 0.014                          |
| CKD stage 4                 | 0.7                            | 0.1                             | 0.098                          |  | 0.1                             | 0.1                            | 0.005                          |
| CKD stage 5                 | 0.5                            | 0.3                             | 0.028                          |  | 0.4                             | 0.4                            | 0.008                          |
| CKD stage unknown           | 0.9                            | 0.6                             | 0.038                          |  | 0.6                             | 0.8                            | 0.015                          |
| Diabetes                    | 15.8                           | 9.0                             | 0.207                          |  | 11.7                            | 11.4                           | 0.009                          |
| Hypertension                | 53.6                           | 44.6                            | 0.181                          |  | 47.4                            | 48.1                           | 0.013                          |
| Liver disease               | 2.8                            | 1.9                             | 0.059                          |  | 2.7                             | 2.4                            | 0.018                          |
| Transient ischaemic attack  | 4.2                            | 3.6                             | 0.031                          |  | 4.0                             | 4.0                            | 0.001                          |
| Ischaemic heart disease     | 18.5                           | 15.5                            | 0.079                          |  | 17.9                            | 18.1                           | 0.005                          |
| Congestive heart failure    | 5.0                            | 3.9                             | 0.049                          |  | 4.6                             | 4.5                            | 0.004                          |
| Myocardial infarction       | 6.5                            | 4.7                             | 0.077                          |  | 5.6                             | 5.8                            | 0.008                          |
| Stroke                      | 4.2                            | 3.1                             | 0.058                          |  | 3.6                             | 3.6                            | 0.001                          |
| Angina                      | 12.6                           | 11.6                            | 0.029                          |  | 13.3                            | 13.5                           | 0.004                          |
| Peripheral vascular disease | 2.5                            | 1.7                             | 0.052                          |  | 2.0                             | 2.1                            | 0.005                          |
| Pneumonia or infection      | 8.7                            | 8.0                             | 0.025                          |  | 9.5                             | 9.2                            | 0.011                          |

| Hyperlipidaemia                       | 18.1                | 12.2                 | 0.164                   |  | 14.1                     | 14.9                | 0.021                   |
|---------------------------------------|---------------------|----------------------|-------------------------|--|--------------------------|---------------------|-------------------------|
| Dementia                              | 1.1                 | 0.7                  | 0.033                   |  | 0.6                      | 0.7                 | 0.007                   |
| Varicose veins                        | 13.9                | 14.6                 | 0.018                   |  | 14.8                     | 14.5                | 0.007                   |
| Variable list                         | Unmatched           |                      | Standardized difference |  | Propensity-score matched |                     | Standardized difference |
|                                       | Tramadol (n=39,075) | Celecoxib (n=11,625) |                         |  | Tramadol (n=5,674)       | Celecoxib (n=5,674) |                         |
| Other circulatory disease             | 34.9                | 31.4                 | 0.075                   |  | 34.9                     | 34.1                | 0.016                   |
| Depression                            | 15.6                | 13.1                 | 0.073                   |  | 15.3                     | 15.2                | 0.001                   |
| Venous thromboembolism                | 5.3                 | 4.3                  | 0.048                   |  | 4.9                      | 4.9                 | 0.002                   |
| Chronic obstructive pulmonary disease | 6.8                 | 4.2                  | 0.114                   |  | 5.5                      | 5.1                 | 0.015                   |
| Atrial fibrillation                   | 7.7                 | 3.7                  | 0.172                   |  | 4.8                      | 4.7                 | 0.005                   |
| Anxiety                               | 16.7                | 15.2                 | 0.172                   |  | 17.2                     | 17.6                | 0.005                   |
| Seizure                               | 0.5                 | 0.3                  | 0.042                   |  | 0.4                      | 0.4                 | 0.003                   |
| Sleep disorder or sleep apnea         | 2.2                 | 1.5                  | 0.049                   |  | 1.9                      | 1.7                 | 0.011                   |
| <b>Medication (%)</b>                 |                     |                      |                         |  |                          |                     |                         |
| Other NSAIDs                          | 88.4                | 88.8                 | 0.013                   |  | 90.6                     | 91.3                | 0.025                   |
| Other opioids                         | 42.6                | 30.0                 | 0.264                   |  | 39.6                     | 39.5                | 0.003                   |
| Aspirin                               | 40.7                | 31.1                 | 0.200                   |  | 34.1                     | 34.9                | 0.016                   |
| Statin                                | 47.9                | 28.3                 | 0.413                   |  | 33.7                     | 34.2                | 0.010                   |
| Glucocorticoids                       | 25.9                | 19.9                 | 0.145                   |  | 23.9                     | 22.7                | 0.028                   |
| Nitrates                              | 17.4                | 13.9                 | 0.097                   |  | 16.7                     | 17.2                | 0.014                   |
| Antihypertensive medicine             | 71.4                | 63.8                 | 0.164                   |  | 68.2                     | 68.3                | 0.002                   |
| Antidiabetic medicine                 | 11.4                | 6.6                  | 0.170                   |  | 8.4                      | 8.6                 | 0.005                   |
| ACE inhibitors                        | 39.3                | 24.3                 | 0.325                   |  | 28.6                     | 28.9                | 0.007                   |
| Angiotensin receptor blocker          | 14.4                | 8.3                  | 0.193                   |  | 8.8                      | 8.9                 | 0.002                   |

| Beta receptor inhibitor                  | 37.9                | 32.6                 | 0.112                   |  | 35.2                     | 35.6                | 0.007                   |
|------------------------------------------|---------------------|----------------------|-------------------------|--|--------------------------|---------------------|-------------------------|
| Calcium channel blockers                 | 38.0                | 27.8                 | 0.218                   |  | 32.3                     | 32.4                | 0.002                   |
| Loop diuretics                           | 25.4                | 21.6                 | 0.089                   |  | 24.8                     | 25.0                | 0.004                   |
| Thiazide-like diuretics                  | 6.4                 | 5.6                  | 0.035                   |  | 5.6                      | 5.9                 | 0.012                   |
| Variable list                            | Unmatched           |                      | Standardized difference |  | Propensity-score matched |                     | Standardized difference |
|                                          | Tramadol (n=39,075) | Celecoxib (n=11,625) |                         |  | Tramadol (n=5,674)       | Celecoxib (n=5,674) |                         |
| Potassium-sparing diuretics              | 11.4                | 12.6                 | 0.037                   |  | 13.8                     | 13.5                | 0.008                   |
| Insulin                                  | 3.0                 | 1.5                  | 0.100                   |  | 2.2                      | 2.0                 | 0.007                   |
| Anticoagulants                           | 10.5                | 4.2                  | 0.244                   |  | 6.3                      | 6.2                 | 0.004                   |
| Benzodiazepines                          | 40.2                | 34.1                 | 0.126                   |  | 39.9                     | 39.7                | 0.006                   |
| SSRI                                     | 23.9                | 17.6                 | 0.156                   |  | 21.4                     | 21.0                | 0.010                   |
| SNRI                                     | 6.5                 | 4.8                  | 0.075                   |  | 5.5                      | 5.4                 | 0.001                   |
| <b>Healthcare utilization, mean (SD)</b> |                     |                      |                         |  |                          |                     |                         |
| Hospitalizations <sup>b</sup>            | 0.8 (1.6)           | 0.3 (0.9)            | 0.440                   |  | 0.4 (1.0)                | 0.4 (1.0)           | 0.023                   |
| General practice visits <sup>b</sup>     | 14.2 (11.9)         | 12.2 (10.1)          | 0.181                   |  | 14.1 (10.7)              | 13.9 (11.1)         | 0.018                   |
| Specialist referrals <sup>b</sup>        | 1.3 (1.8)           | 0.8 (1.3)            | 0.352                   |  | 1.0 (1.3)                | 1.0 (1.4)           | 0.002                   |

Abbreviations: BMI, body mass index; n, number; CKD, chronic kidney disease; NSAID, non-steroidal anti-inflammatory drug; ACE, angiotensin converting enzyme; SSRI, Selective serotonin reuptake inhibitor; SNRI, Serotonin–norepinephrine reuptake inhibitor; OA, osteoarthritis; y, years; SD, standard deviation.

<sup>a</sup> The Socioeconomic deprivation index score (i.e., Townsend Deprivation Index) ranged from 1 (least deprived) to 5 (most deprived).

<sup>b</sup> Frequency during the past two years.



**eTable 4. Baseline characteristics of unmatched and propensity-score matched osteoarthritis patients (≥ 50 years) initiating tramadol prescription or etoricoxib prescription**

| Variable list                                                 | Unmatched           |                      | Standardized difference | Propensity-score matched |                      | Standardized difference |
|---------------------------------------------------------------|---------------------|----------------------|-------------------------|--------------------------|----------------------|-------------------------|
|                                                               | Tramadol (n=44,036) | Etoricoxib (n=4,006) |                         | Tramadol (n=2,946)       | Etoricoxib (n=2,946) |                         |
| <b>Demographics</b>                                           |                     |                      |                         |                          |                      |                         |
| Age, mean (SD), y                                             | 70.4 (9.7)          | 69.0 (9.6)           | 0.142                   | 68.9 (9.4)               | 68.9 (9.4)           | 0.002                   |
| Socioeconomic deprivation index score, mean (SD) <sup>a</sup> | 2.6 (1.4)           | 2.5 (1.4)            | 0.063                   | 2.5 (1.4)                | 2.5 (1.4)            | 0.028                   |
| Female (%)                                                    | 62.4                | 61.4                 | 0.022                   | 62.5                     | 62.2                 | 0.006                   |
| <b>Time block</b>                                             |                     |                      |                         |                          |                      |                         |
| 01/01/2000-12/31/2000                                         | 2.2                 | -                    | 0.210                   | -                        | -                    | -                       |
| 01/01/2001-12/31/2001                                         | 3.2                 | -                    | 0.258                   | -                        | -                    | -                       |
| 01/01/2002-12/31/2002                                         | 4.1                 | 4.4                  | 0.017                   | 4.2                      | 4.2                  | 0.000                   |
| 01/01/2003-12/31/2003                                         | 4.8                 | 14.7                 | 0.337                   | 14.2                     | 14.2                 | 0.000                   |
| 01/01/2004-12/31/2004                                         | 5.4                 | 24.3                 | 0.549                   | 24.3                     | 24.3                 | 0.000                   |
| 01/01/2005-12/31/2005                                         | 7.4                 | 7.7                  | 0.013                   | 7.5                      | 7.5                  | 0.000                   |
| 01/01/2006-12/31/2006                                         | 7.7                 | 7.0                  | 0.026                   | 7.3                      | 7.3                  | 0.000                   |
| 01/01/2007-12/31/2007                                         | 8.1                 | 8.7                  | 0.022                   | 8.7                      | 8.7                  | 0.000                   |
| 01/01/2008-12/31/2008                                         | 8.3                 | 7.5                  | 0.031                   | 8.1                      | 8.1                  | 0.000                   |
| 01/01/2009-12/31/2009                                         | 8.4                 | 6.2                  | 0.084                   | 6.7                      | 6.7                  | 0.000                   |
| 01/01/2010-12/31/2010                                         | 8.4                 | 5.8                  | 0.101                   | 5.6                      | 5.6                  | 0.000                   |
| 01/01/2011-12/31/2011                                         | 8.2                 | 4.4                  | 0.156                   | 4.2                      | 4.2                  | 0.000                   |
| 01/01/2012-12/31/2012                                         | 7.8                 | 2.9                  | 0.216                   | 3.1                      | 3.1                  | 0.000                   |

|                                         |                            |                             |                                |  |                                 |                             |                                |
|-----------------------------------------|----------------------------|-----------------------------|--------------------------------|--|---------------------------------|-----------------------------|--------------------------------|
| 01/01/2013-12/31/2013                   | 6.9                        | 2.3                         | 0.219                          |  | 2.5                             | 2.5                         | 0.000                          |
| <b>Variable list</b>                    | <b>Unmatched</b>           |                             | <b>Standardized difference</b> |  | <b>Propensity-score matched</b> |                             | <b>Standardized difference</b> |
|                                         | <b>Tramadol (n=44,036)</b> | <b>Etoricoxib (n=4,006)</b> |                                |  | <b>Tramadol (n=2,946)</b>       | <b>Etoricoxib (n=2,946)</b> |                                |
| 01/01/2014-12/31/2014                   | 5.3                        | 2.0                         | 0.180                          |  | 1.8                             | 1.8                         | 0.000                          |
| 01/01/2015-12/31/2015                   | 3.8                        | 2.0                         | 0.106                          |  | 1.7                             | 1.7                         | 0.000                          |
| <b>BMI, mean (SD), kg/m<sup>2</sup></b> | 29.5 (5.9)                 | 28.6 (5.3)                  | 0.154                          |  | 28.7 (5.7)                      | 28.6 (5.3)                  | 0.004                          |
| <b>OA duration, mean (SD), y</b>        | 7.0 (6.9)                  | 6.2 (6.3)                   | 0.121                          |  | 6.3 (6.3)                       | 6.3 (6.3)                   | 0.003                          |
| <b>Site of OA</b>                       |                            |                             |                                |  |                                 |                             |                                |
| Knee OA only                            | 54.0                       | 54.9                        | 0.018                          |  | 56.1                            | 56.0                        | 0.001                          |
| Hip OA only                             | 28.9                       | 23.5                        | 0.122                          |  | 22.2                            | 22.2                        | 0.001                          |
| Hand OA only                            | 7.8                        | 12.8                        | 0.164                          |  | 12.9                            | 12.5                        | 0.013                          |
| Knee and hip OA                         | 5.7                        | 4.8                         | 0.043                          |  | 4.7                             | 5.0                         | 0.017                          |
| Knee and hand OA                        | 2.2                        | 2.4                         | 0.019                          |  | 2.6                             | 2.7                         | 0.006                          |
| Hip and hand OA                         | 1.0                        | 1.1                         | 0.012                          |  | 1.0                             | 1.1                         | 0.003                          |
| Knee, hip, and hand OA                  | 0.4                        | 0.4                         | 0.000                          |  | 0.5                             | 0.4                         | 0.005                          |
| <b>Lifestyle factors</b>                |                            |                             |                                |  |                                 |                             |                                |
| <b>Drinking (%)</b>                     |                            |                             |                                |  |                                 |                             |                                |
| None                                    | 21.8                       | 20.9                        | 0.034                          |  | 20.5                            | 20.7                        | 0.004                          |
| Past                                    | 3.1                        | 2.3                         | 0.051                          |  | 2.9                             | 2.4                         | 0.027                          |
| Current                                 | 75.1                       | 76.8                        | 0.009                          |  | 76.6                            | 76.8                        | 0.006                          |
| <b>Smoking (%)</b>                      |                            |                             |                                |  |                                 |                             |                                |
| None                                    | 53.3                       | 57.1                        | 0.064                          |  | 57.8                            | 56.4                        | 0.029                          |
| Past                                    | 33.0                       | 30.7                        | 0.055                          |  | 30.9                            | 31.9                        | 0.023                          |
| Current                                 | 13.7                       | 12.2                        | 0.046                          |  | 11.3                            | 11.6                        | 0.011                          |

| <b>Comorbidity (%)</b>      |                            |                             |                                |  |                                 |                             |                                |
|-----------------------------|----------------------------|-----------------------------|--------------------------------|--|---------------------------------|-----------------------------|--------------------------------|
| Peptic ulcer                | 9.0                        | 7.0                         | 0.072                          |  | 6.1                             | 6.6                         | 0.017                          |
| <b>Variable list</b>        | <b>Unmatched</b>           |                             | <b>Standardized difference</b> |  | <b>Propensity-score matched</b> |                             | <b>Standardized difference</b> |
|                             | <b>Tramadol (n=44,036)</b> | <b>Etoricoxib (n=4,006)</b> |                                |  | <b>Tramadol (n=2,946)</b>       | <b>Etoricoxib (n=2,946)</b> |                                |
| Gastrointestinal bleeding   | 3.1                        | 1.8                         | 0.087                          |  | 2.0                             | 1.8                         | 0.015                          |
| CKD                         |                            |                             |                                |  |                                 |                             |                                |
| Non-CKD                     | 87.0                       | 93.3                        | 0.214                          |  | 92.6                            | 93.0                        | 0.013                          |
| CKD stage 1                 | 0.1                        | 0.0                         | 0.020                          |  | 0.1                             | 0.1                         | 0.012                          |
| CKD stage 2                 | 1.2                        | 0.6                         | 0.055                          |  | 0.7                             | 0.8                         | 0.012                          |
| CKD stage 3                 | 9.7                        | 4.9                         | 0.182                          |  | 5.5                             | 5.1                         | 0.021                          |
| CKD stage 4                 | 0.7                        | 0.2                         | 0.064                          |  | 0.3                             | 0.3                         | 0.000                          |
| CKD stage 5                 | 0.5                        | 0.2                         | 0.052                          |  | 0.2                             | 0.2                         | 0.015                          |
| CKD stage unknown           | 0.9                        | 0.6                         | 0.036                          |  | 0.6                             | 0.6                         | 0.000                          |
| Diabetes                    | 15.5                       | 9.8                         | 0.171                          |  | 11.2                            | 10.8                        | 0.014                          |
| Hypertension                | 53.8                       | 46.8                        | 0.141                          |  | 47.8                            | 47.8                        | 0.001                          |
| Liver disease               | 2.7                        | 2.1                         | 0.040                          |  | 2.6                             | 2.3                         | 0.020                          |
| Transient ischaemic attack  | 4.3                        | 2.6                         | 0.090                          |  | 2.1                             | 2.7                         | 0.044                          |
| Ischaemic heart disease     | 18.6                       | 13.0                        | 0.154                          |  | 13.1                            | 13.7                        | 0.016                          |
| Congestive heart failure    | 5.0                        | 3.2                         | 0.093                          |  | 3.3                             | 3.2                         | 0.010                          |
| Myocardial infarction       | 6.5                        | 4.3                         | 0.099                          |  | 4.3                             | 4.7                         | 0.018                          |
| Stroke                      | 4.3                        | 2.6                         | 0.093                          |  | 2.5                             | 2.6                         | 0.011                          |
| Angina                      | 12.6                       | 9.3                         | 0.106                          |  | 9.9                             | 10.0                        | 0.005                          |
| Peripheral vascular disease | 2.5                        | 1.4                         | 0.077                          |  | 1.3                             | 1.5                         | 0.012                          |
| Pneumonia or infection      | 8.6                        | 7.8                         | 0.029                          |  | 8.8                             | 8.4                         | 0.016                          |

| Hyperlipidaemia                       | 18.0                | 15.3                 | 0.075                   |  | 16.5                     | 16.3                 | 0.005                   |
|---------------------------------------|---------------------|----------------------|-------------------------|--|--------------------------|----------------------|-------------------------|
| Dementia                              | 1.1                 | 0.5                  | 0.067                   |  | 0.4                      | 0.3                  | 0.011                   |
| Varicose veins                        | 14.2                | 14.2                 | 0.001                   |  | 15.6                     | 15.2                 | 0.010                   |
| Variable list                         | Unmatched           |                      | Standardized difference |  | Propensity-score matched |                      | Standardized difference |
|                                       | Tramadol (n=44,036) | Etoricoxib (n=4,006) |                         |  | Tramadol (n=2,946)       | Etoricoxib (n=2,946) |                         |
| Other circulatory disease             | 35.4                | 30.0                 | 0.117                   |  | 33.1                     | 31.7                 | 0.029                   |
| Depression                            | 15.8                | 13.9                 | 0.055                   |  | 14.5                     | 14.8                 | 0.008                   |
| Venous thromboembolism                | 5.4                 | 3.8                  | 0.073                   |  | 4.2                      | 3.8                  | 0.023                   |
| Chronic obstructive pulmonary disease | 6.8                 | 4.3                  | 0.111                   |  | 5.0                      | 4.2                  | 0.041                   |
| Atrial fibrillation                   | 7.5                 | 3.6                  | 0.170                   |  | 3.6                      | 3.9                  | 0.013                   |
| Anxiety                               | 16.9                | 14.0                 | 0.170                   |  | 15.3                     | 15.1                 | 0.013                   |
| Seizure                               | 0.5                 | 0.3                  | 0.040                   |  | 0.2                      | 0.3                  | 0.020                   |
| Sleep disorder or sleep apnea         | 2.3                 | 1.6                  | 0.050                   |  | 1.8                      | 1.7                  | 0.008                   |
| <b>Medication (%)</b>                 |                     |                      |                         |  |                          |                      |                         |
| Other NSAIDs                          | 89.7                | 93.4                 | 0.135                   |  | 94.7                     | 94.1                 | 0.028                   |
| Other opioids                         | 43.4                | 30.8                 | 0.264                   |  | 33.3                     | 32.5                 | 0.017                   |
| Aspirin                               | 41.0                | 30.4                 | 0.223                   |  | 30.2                     | 31.3                 | 0.024                   |
| Statin                                | 48.0                | 37.1                 | 0.222                   |  | 39.5                     | 39.5                 | 0.001                   |
| Glucocorticoids                       | 26.3                | 22.5                 | 0.089                   |  | 22.6                     | 23.2                 | 0.012                   |
| Nitrates                              | 17.8                | 12.0                 | 0.165                   |  | 12.7                     | 12.8                 | 0.005                   |
| Antihypertensive medicine             | 71.8                | 64.2                 | 0.165                   |  | 64.8                     | 65.1                 | 0.008                   |
| Antidiabetic medicine                 | 11.1                | 7.1                  | 0.142                   |  | 8.4                      | 7.9                  | 0.020                   |
| ACE inhibitors                        | 39.1                | 27.8                 | 0.241                   |  | 28.8                     | 29.2                 | 0.010                   |
| Angiotensin receptor blocker          | 14.6                | 12.2                 | 0.069                   |  | 11.8                     | 12.1                 | 0.008                   |

| Beta receptor inhibitor                  | 38.4                | 32.7                 | 0.118                   |  | 34.2                     | 34.0                 | 0.004                   |
|------------------------------------------|---------------------|----------------------|-------------------------|--|--------------------------|----------------------|-------------------------|
| Calcium channel blockers                 | 38.1                | 29.3                 | 0.187                   |  | 30.8                     | 30.8                 | 0.000                   |
| Loop diuretics                           | 25.9                | 19.6                 | 0.151                   |  | 19.1                     | 20.0                 | 0.022                   |
| Thiazide-like diuretics                  | 6.5                 | 6.7                  | 0.007                   |  | 6.7                      | 7.0                  | 0.012                   |
| Variable list                            | Unmatched           |                      | Standardized difference |  | Propensity-score matched |                      | Standardized difference |
|                                          | Tramadol (n=44,036) | Etoricoxib (n=4,006) |                         |  | Tramadol (n=2,946)       | Etoricoxib (n=2,946) |                         |
| Potassium-sparing diuretics              | 11.8                | 10.5                 | 0.043                   |  | 10.6                     | 10.6                 | 0.000                   |
| Insulin                                  | 2.9                 | 1.3                  | 0.115                   |  | 1.6                      | 1.5                  | 0.006                   |
| Anticoagulants                           | 10.3                | 4.5                  | 0.222                   |  | 4.9                      | 4.9                  | 0.003                   |
| Benzodiazepines                          | 41.0                | 36.4                 | 0.094                   |  | 39.1                     | 38.1                 | 0.021                   |
| SSRI                                     | 24.3                | 21.2                 | 0.074                   |  | 23.2                     | 22.5                 | 0.015                   |
| SNRI                                     | 6.7                 | 6.0                  | 0.028                   |  | 5.7                      | 5.9                  | 0.010                   |
| <b>Healthcare utilization, mean (SD)</b> |                     |                      |                         |  |                          |                      |                         |
| Hospitalizations <sup>b</sup>            | 0.8 (1.6)           | 0.4 (1.0)            | 0.312                   |  | 0.5 (1.0)                | 0.4 (1.0)            | 0.036                   |
| General practice visits <sup>b</sup>     | 14.5 (12.2)         | 12.2 (9.4)           | 0.211                   |  | 13.0 (9.7)               | 12.8 (9.2)           | 0.017                   |
| Specialist referrals <sup>b</sup>        | 1.3 (1.8)           | 0.9 (1.4)            | 0.269                   |  | 1.0 (1.4)                | 1.0 (1.4)            | 0.003                   |

Abbreviations: BMI, body mass index; n, number; CKD, chronic kidney disease; NSAID, non-steroidal anti-inflammatory drug; ACE, angiotensin converting enzyme; SSRI, Selective serotonin reuptake inhibitor; SNRI, Serotonin–norepinephrine reuptake inhibitor; OA, osteoarthritis; y, years; SD, standard deviation.

<sup>a</sup> The Socioeconomic deprivation index score (i.e., Townsend Deprivation Index) ranged from 1 (least deprived) to 5 (most deprived).

<sup>b</sup> Frequency during the past two years.

**eTable 5. Baseline characteristics of unmatched and propensity-score matched osteoarthritis patients (≥ 50 years) initiating tramadol prescription or codeine prescription**

| Variable list                                                 | Unmatched           |                    | Standardized difference | Propensity-score matched |                    | Standardized difference |
|---------------------------------------------------------------|---------------------|--------------------|-------------------------|--------------------------|--------------------|-------------------------|
|                                                               | Tramadol (n=34,353) | Codeine (n=23,899) |                         | Tramadol (n=16,922)      | Codeine (n=16,922) |                         |
| <b>Demographics</b>                                           |                     |                    |                         |                          |                    |                         |
| Age, mean (SD), y                                             | 70.0 (9.7)          | 71.6 (9.7)         | 0.172                   | 70.9 (9.5)               | 71.0 (9.5)         | 0.002                   |
| Socioeconomic deprivation index score, mean (SD) <sup>a</sup> | 2.6 (1.4)           | 2.5 (1.3)          | 0.082                   | 2.5 (1.3)                | 2.5 (1.4)          | 0.008                   |
| Female (%)                                                    | 60.9                | 61.4               | 0.011                   | 60.8                     | 60.5               | 0.007                   |
| <b>Time block</b>                                             |                     |                    |                         |                          |                    |                         |
| 01/01/2000-12/31/2000                                         | 2.3                 | 3.5                | 0.075                   | 2.4                      | 2.4                | 0.000                   |
| 01/01/2001-12/31/2001                                         | 3.3                 | 4.4                | 0.058                   | 3.4                      | 3.4                | 0.000                   |
| 01/01/2002-12/31/2002                                         | 4.1                 | 4.5                | 0.016                   | 3.9                      | 3.9                | 0.000                   |
| 01/01/2003-12/31/2003                                         | 4.8                 | 5.3                | 0.025                   | 5.0                      | 5.0                | 0.000                   |
| 01/01/2004-12/31/2004                                         | 5.7                 | 5.6                | 0.004                   | 5.5                      | 5.5                | 0.000                   |
| 01/01/2005-12/31/2005                                         | 7.7                 | 7.0                | 0.027                   | 7.6                      | 7.6                | 0.000                   |
| 01/01/2006-12/31/2006                                         | 7.8                 | 7.0                | 0.032                   | 7.5                      | 7.5                | 0.000                   |
| 01/01/2007-12/31/2007                                         | 8.2                 | 6.9                | 0.048                   | 7.7                      | 7.7                | 0.000                   |
| 01/01/2008-12/31/2008                                         | 8.5                 | 7.5                | 0.039                   | 8.2                      | 8.2                | 0.000                   |
| 01/01/2009-12/31/2009                                         | 8.5                 | 7.2                | 0.048                   | 7.9                      | 7.9                | 0.000                   |
| 01/01/2010-12/31/2010                                         | 8.4                 | 7.0                | 0.049                   | 7.6                      | 7.6                | 0.000                   |
| 01/01/2011-12/31/2011                                         | 7.9                 | 7.3                | 0.023                   | 8.1                      | 8.1                | 0.000                   |
| 01/01/2012-12/31/2012                                         | 7.4                 | 7.5                | 0.002                   | 7.9                      | 7.9                | 0.000                   |

| 01/01/2013-12/31/2013                   | 6.6                 | 6.9                | 0.009                   |  | 7.2                      | 7.2                | 0.000                   |
|-----------------------------------------|---------------------|--------------------|-------------------------|--|--------------------------|--------------------|-------------------------|
| Variable list                           | Unmatched           |                    | Standardized difference |  | Propensity-score matched |                    | Standardized difference |
|                                         | Tramadol (n=34,353) | Codeine (n=23,899) |                         |  | Tramadol (n=16,922)      | Codeine (n=16,922) |                         |
| 01/01/2014-12/31/2014                   | 5.1                 | 6.8                | 0.069                   |  | 6.0                      | 6.0                | 0.000                   |
| 01/01/2015-12/31/2015                   | 3.6                 | 5.7                | 0.097                   |  | 4.1                      | 4.1                | 0.000                   |
| <b>BMI, mean (SD), kg/m<sup>2</sup></b> | 29.5 (5.9)          | 28.6 (5.4)         | 0.144                   |  | 28.8 (5.5)               | 28.8 (5.5)         | 0.006                   |
| <b>OA duration, mean (SD), y</b>        | 6.8 (6.8)           | 7.3 (7.0)          | 0.084                   |  | 7.2 (7.0)                | 7.1 (6.8)          | 0.004                   |
| <b>Site of OA</b>                       |                     |                    |                         |  |                          |                    |                         |
| Knee OA only                            | 53.8                | 55.1               | 0.025                   |  | 55.6                     | 56.1               | 0.010                   |
| Hip OA only                             | 29.8                | 26.6               | 0.071                   |  | 26.5                     | 26.1               | 0.009                   |
| Hand OA only                            | 7.7                 | 10.2               | 0.087                   |  | 9.5                      | 9.4                | 0.003                   |
| Knee and hip OA                         | 5.3                 | 4.8                | 0.024                   |  | 5.1                      | 5.1                | 0.001                   |
| Knee and hand OA                        | 2.0                 | 2.0                | 0.002                   |  | 2.1                      | 2.1                | 0.003                   |
| Hip and hand OA                         | 1.0                 | 1.0                | 0.007                   |  | 1.0                      | 0.9                | 0.007                   |
| Knee, hip, and hand OA                  | 0.4                 | 0.2                | 0.024                   |  | 0.2                      | 0.2                | 0.001                   |
| <b>Lifestyle factors</b>                |                     |                    |                         |  |                          |                    |                         |
| Drinking (%)                            |                     |                    |                         |  |                          |                    |                         |
| None                                    | 21.2                | 20.4               | 0.011                   |  | 20.0                     | 20.2               | 0.004                   |
| Past                                    | 2.8                 | 3.1                | 0.019                   |  | 2.9                      | 3.0                | 0.006                   |
| Current                                 | 76.0                | 76.5               | 0.025                   |  | 77.1                     | 76.8               | 0.006                   |
| Smoking (%)                             |                     |                    |                         |  |                          |                    |                         |
| None                                    | 53.3                | 56.4               | 0.063                   |  | 54.9                     | 55.1               | 0.005                   |
| Past                                    | 32.6                | 32.8               | 0.007                   |  | 34.0                     | 33.9               | 0.001                   |
| Current                                 | 14.0                | 10.8               | 0.095                   |  | 11.1                     | 11.0               | 0.005                   |

| <b>Comorbidity (%)</b>      |                                |                               |                                |                                 |                               |                                |       |
|-----------------------------|--------------------------------|-------------------------------|--------------------------------|---------------------------------|-------------------------------|--------------------------------|-------|
| Peptic ulcer                | 8.6                            | 7.8                           | 0.030                          |                                 | 7.8                           | 7.9                            | 0.004 |
| <b>Variable list</b>        | <b>Unmatched</b>               |                               | <b>Standardized difference</b> | <b>Propensity-score matched</b> |                               | <b>Standardized difference</b> |       |
|                             | <b>Tramadol<br/>(n=34,353)</b> | <b>Codeine<br/>(n=23,899)</b> |                                | <b>Tramadol<br/>(n=16,922)</b>  | <b>Codeine<br/>(n=16,922)</b> |                                |       |
| Gastrointestinal bleeding   | 2.8                            | 2.8                           | 0.005                          |                                 | 2.7                           | 2.8                            | 0.005 |
| CKD                         |                                |                               |                                |                                 |                               |                                |       |
| Non-CKD                     | 87.9                           | 87.3                          | 0.019                          |                                 | 87.4                          | 87.1                           | 0.007 |
| CKD stage 1                 | 0.1                            | 0.1                           | 0.002                          |                                 | 0.1                           | 0.1                            | 0.004 |
| CKD stage 2                 | 1.1                            | 1.0                           | 0.013                          |                                 | 1.0                           | 1.0                            | 0.006 |
| CKD stage 3                 | 9.0                            | 9.6                           | 0.024                          |                                 | 9.7                           | 9.9                            | 0.006 |
| CKD stage 4                 | 0.6                            | 0.6                           | 0.003                          |                                 | 0.6                           | 0.6                            | 0.006 |
| CKD stage 5                 | 0.4                            | 0.5                           | 0.010                          |                                 | 0.4                           | 0.4                            | 0.003 |
| CKD stage unknown           | 0.9                            | 0.9                           | 0.000                          |                                 | 0.8                           | 0.8                            | 0.003 |
| Diabetes                    | 14.6                           | 14.8                          | 0.004                          |                                 | 15.3                          | 15.4                           | 0.003 |
| Hypertension                | 52.2                           | 53.3                          | 0.022                          |                                 | 54.2                          | 54.6                           | 0.008 |
| Liver disease               | 2.6                            | 2.6                           | 0.005                          |                                 | 2.5                           | 2.6                            | 0.006 |
| Transient ischaemic attack  | 3.9                            | 4.5                           | 0.029                          |                                 | 4.2                           | 4.2                            | 0.001 |
| Ischaemic heart disease     | 17.5                           | 17.9                          | 0.011                          |                                 | 18.0                          | 18.2                           | 0.004 |
| Congestive heart failure    | 4.4                            | 5.4                           | 0.049                          |                                 | 4.8                           | 4.8                            | 0.002 |
| Myocardial infarction       | 6.2                            | 6.6                           | 0.018                          |                                 | 6.6                           | 6.6                            | 0.002 |
| Stroke                      | 3.9                            | 4.7                           | 0.040                          |                                 | 4.2                           | 4.3                            | 0.006 |
| Angina                      | 11.6                           | 12.2                          | 0.018                          |                                 | 12.5                          | 12.5                           | 0.002 |
| Peripheral vascular disease | 2.4                            | 2.1                           | 0.018                          |                                 | 2.1                           | 2.1                            | 0.002 |
| Pneumonia or infection      | 7.9                            | 8.0                           | 0.005                          |                                 | 7.9                           | 8.1                            | 0.007 |



| Hyperlipidaemia                       | 17.6                | 16.7               | 0.021                   |  | 18.3                     | 18.3               | 0.000                   |
|---------------------------------------|---------------------|--------------------|-------------------------|--|--------------------------|--------------------|-------------------------|
| Dementia                              | 1.0                 | 2.1                | 0.092                   |  | 1.1                      | 1.2                | 0.013                   |
| Varicose veins                        | 13.5                | 14.9               | 0.039                   |  | 14.7                     | 14.9               | 0.005                   |
| Variable list                         | Unmatched           |                    | Standardized difference |  | Propensity-score matched |                    | Standardized difference |
|                                       | Tramadol (n=34,353) | Codeine (n=23,899) |                         |  | Tramadol (n=16,922)      | Codeine (n=16,922) |                         |
| Other circulatory disease             | 33.3                | 36.0               | 0.057                   |  | 36.4                     | 36.7               | 0.006                   |
| Depression                            | 15.0                | 13.0               | 0.056                   |  | 13.5                     | 13.7               | 0.005                   |
| Venous thromboembolism                | 5.0                 | 5.0                | 0.004                   |  | 5.1                      | 5.0                | 0.003                   |
| Chronic obstructive pulmonary disease | 6.2                 | 5.7                | 0.017                   |  | 5.8                      | 5.9                | 0.002                   |
| Atrial fibrillation                   | 6.9                 | 8.6                | 0.064                   |  | 7.8                      | 8.0                | 0.007                   |
| Anxiety                               | 15.8                | 15.2               | 0.064                   |  | 15.7                     | 15.7               | 0.007                   |
| Seizure                               | 0.5                 | 0.5                | 0.010                   |  | 0.4                      | 0.4                | 0.003                   |
| Sleep disorder or sleep apnea         | 2.1                 | 1.8                | 0.017                   |  | 1.9                      | 1.9                | 0.005                   |
| <b>Medication (%)</b>                 |                     |                    |                         |  |                          |                    |                         |
| Other NSAIDs                          | 89.5                | 85.4               | 0.125                   |  | 88.0                     | 87.8               | 0.007                   |
| Other opioids                         | 23.7                | 15.5               | 0.206                   |  | 17.3                     | 17.1               | 0.004                   |
| Aspirin                               | 39.0                | 40.0               | 0.020                   |  | 40.0                     | 40.3               | 0.006                   |
| Statin                                | 46.1                | 44.9               | 0.025                   |  | 47.0                     | 47.2               | 0.004                   |
| Glucocorticoids                       | 23.9                | 23.1               | 0.020                   |  | 24.1                     | 24.0               | 0.002                   |
| Nitrates                              | 16.1                | 16.5               | 0.009                   |  | 16.8                     | 16.8               | 0.001                   |
| Antihypertensive medicine             | 69.8                | 69.6               | 0.004                   |  | 70.1                     | 70.5               | 0.010                   |
| Antidiabetic medicine                 | 10.6                | 10.5               | 0.005                   |  | 10.9                     | 11.0               | 0.002                   |
| ACE inhibitors                        | 37.1                | 38.5               | 0.028                   |  | 39.0                     | 39.1               | 0.003                   |
| Angiotensin receptor blocker          | 13.9                | 13.5               | 0.012                   |  | 14.1                     | 14.2               | 0.003                   |

| Beta receptor inhibitor                  | 36.4                | 38.4               | 0.040                   |  | 38.9                     | 39.1               | 0.004                   |
|------------------------------------------|---------------------|--------------------|-------------------------|--|--------------------------|--------------------|-------------------------|
| Calcium channel blockers                 | 35.9                | 36.7               | 0.015                   |  | 37.5                     | 37.5               | 0.002                   |
| Loop diuretics                           | 24.1                | 23.4               | 0.015                   |  | 23.1                     | 23.1               | 0.000                   |
| Thiazide-like diuretics                  | 6.3                 | 6.3                | 0.001                   |  | 6.3                      | 6.4                | 0.003                   |
| Variable list                            | Unmatched           |                    | Standardized difference |  | Propensity-score matched |                    | Standardized difference |
|                                          | Tramadol (n=34,353) | Codeine (n=23,899) |                         |  | Tramadol (n=16,922)      | Codeine (n=16,922) |                         |
| Potassium-sparing diuretics              | 11.0                | 10.4               | 0.019                   |  | 10.3                     | 10.3               | 0.001                   |
| Insulin                                  | 2.6                 | 2.4                | 0.016                   |  | 2.5                      | 2.5                | 0.001                   |
| Anticoagulants                           | 9.3                 | 10.3               | 0.035                   |  | 10.1                     | 10.1               | 0.002                   |
| Benzodiazepines                          | 38.9                | 33.2               | 0.120                   |  | 34.8                     | 34.7               | 0.002                   |
| SSRI                                     | 23.2                | 19.5               | 0.091                   |  | 20.2                     | 20.4               | 0.006                   |
| SNRI                                     | 6.2                 | 5.2                | 0.046                   |  | 5.2                      | 5.3                | 0.007                   |
| <b>Healthcare utilization, mean (SD)</b> |                     |                    |                         |  |                          |                    |                         |
| Hospitalizations <sup>b</sup>            | 0.8 (1.5)           | 0.8 (1.6)          | 0.011                   |  | 0.8 (1.5)                | 0.8 (1.6)          | 0.009                   |
| General practice visits <sup>b</sup>     | 13.6 (11.5)         | 13.8 (11.5)        | 0.018                   |  | 14.2 (11.5)              | 14.1 (10.8)        | 0.009                   |
| Specialist referrals <sup>b</sup>        | 1.3 (1.7)           | 1.2 (1.6)          | 0.051                   |  | 1.3 (1.6)                | 1.3 (1.6)          | 0.002                   |

Abbreviations: BMI, body mass index; n, number; CKD, chronic kidney disease; NSAID, non-steroidal anti-inflammatory drug; ACE, angiotensin converting enzyme; SSRI, Selective serotonin reuptake inhibitor; SNRI, Serotonin–norepinephrine reuptake inhibitor; OA, osteoarthritis; y, years; SD, standard deviation.

<sup>a</sup> The Socioeconomic deprivation index score (i.e., Townsend Deprivation Index) ranged from 1 (least deprived) to 5 (most deprived).

<sup>b</sup> Frequency during the past two years.
